# Supplementary material
Source: HighWire-hosted journal article supplement (https://www.rsfjournal.org/highwire/filestream/4356/field_highwire_adjunct_files/1/Annex_Tables_A1-A4_Survey_Interview_Script.docx)
Supplement: Annex_Tables_A1-A4_Survey_Interview_Script.docx [file Annex_Tables_A1-A4_Survey_Interview_Script.docx]

**Annex**

**Table A1**

Correlates of avoided going to public places

| Variables | Logit coeff | Odds ratio | OLS | Poisson | NBREG |
| --- | --- | --- | --- | --- | --- |
|  |  |  |  |  |  |
| Reliance on vertical ties | 0.551*** | 1.736*** | 0.0730*** | 0.0911*** | 0.0911*** |
|  | (0.167) | (0.290) | (0.0243) | (0.0315) | (0.0315) |
| Reliance on horizontal ties | 0.342* | 1.407* | 0.0388** | 0.0462** | 0.0462** |
|  | (0.181) | (0.254) | (0.0196) | (0.0233) | (0.0233) |
| Age a |  |  |  |  |  |
| 25-34 | -0.166 | 0.847 | -0.0297 | -0.0409 | -0.0409 |
|  | (0.562) | (0.476) | (0.0704) | (0.0829) | (0.0829) |
| 35-44 | 0.180 | 1.197 | 0.00338 | -0.00374 | -0.00374 |
|  | (0.643) | (0.770) | (0.0802) | (0.0949) | (0.0949) |
| 45-54 | -0.0471 | 0.954 | -0.0182 | -0.0280 | -0.0280 |
|  | (0.638) | (0.608) | (0.0838) | (0.100) | (0.100) |
| 55-64 | -0.599 | 0.549 | -0.103 | -0.140 | -0.140 |
|  | (0.615) | (0.338) | (0.0864) | (0.108) | (0.108) |
| 65-74 | 0.593 | 1.809 | 0.0631 | 0.0727 | 0.0727 |
|  | (0.857) | (1.551) | (0.104) | (0.123) | (0.123) |
| 75+ | 1.485 | 4.416 | 0.165 | 0.196 | 0.196 |
|  | (1.074) | (4.743) | (0.140) | (0.172) | (0.172) |
| Income b |  |  |  |  |  |
| $40,001 --- $60,000 | 0.600 | 1.822 | 0.0687 | 0.0814 | 0.0814 |
|  | (0.459) | (0.835) | (0.0645) | (0.0808) | (0.0808) |
| $60,001 --- $80,000 | 0.0510 | 1.052 | -0.0115 | -0.0202 | -0.0202 |
|  | (0.486) | (0.512) | (0.0721) | (0.0934) | (0.0934) |
| $80,001 --- $100,000 | 0.408 | 1.504 | 0.0358 | 0.0386 | 0.0386 |
|  | (0.548) | (0.825) | (0.0759) | (0.0947) | (0.0947) |
| $100,001 --- $120,000 | 0.120 | 1.127 | 0.00423 | 0.00227 | 0.00227 |
|  | (0.558) | (0.629) | (0.0804) | (0.101) | (0.101) |
| Over $120,001 | 0.657 | 1.928 | 0.0803 | 0.0977 | 0.0977 |
|  | (0.508) | (0.980) | (0.0721) | (0.0896) | (0.0896) |
| Education c |  |  |  |  |  |
| High school diploma | -0.842 | 0.431 | -0.102 | -0.123 | -0.123 |
|  | (1.273) | (0.549) | (0.203) | (0.267) | (0.267) |
| Some college, no degree | -1.194 | 0.303 | -0.145 | -0.177 | -0.177 |
|  | (1.211) | (0.367) | (0.193) | (0.256) | (0.256) |
| Bachelor's degree | -0.600 | 0.549 | -0.0388 | -0.0300 | -0.0300 |
|  | (1.178) | (0.646) | (0.184) | (0.240) | (0.240) |
| Master's degree / Professional degree / Doctoral degree | -0.168 | 0.845 | 0.00845 | 0.0249 | 0.0249 |
|  | (1.171) | (0.989) | (0.183) | (0.239) | (0.239) |
| Female = Yes | 0.514** | 1.671** | 0.0643* | 0.0784* | 0.0784* |
|  | (0.260) | (0.435) | (0.0366) | (0.0456) | (0.0456) |
| Minority = Yes | -0.571* | 0.565* | -0.0768 | -0.0953 | -0.0953 |
|  | (0.307) | (0.173) | (0.0494) | (0.0650) | (0.0650) |
| Democrat = Yes | 0.392 | 1.480 | 0.0549 | 0.0696 | 0.0696 |
|  | (0.263) | (0.389) | (0.0367) | (0.0457) | (0.0457) |
| Employment Status d |  |  |  |  |  |
| Employed part-time (up to 39 hours per week) | -0.460 | 0.631 | -0.0671 | -0.0871 | -0.0871 |
|  | (0.435) | (0.275) | (0.0683) | (0.0895) | (0.0895) |
| Furloughed | 0.00586 | 1.006 | -0.00468 | -0.00806 | -0.00806 |
|  | (0.611) | (0.615) | (0.0972) | (0.126) | (0.126) |
| Homemaker | 1.446 | 4.247 | 0.155* | 0.188* | 0.188* |
|  | (1.204) | (5.114) | (0.0843) | (0.0969) | (0.0969) |
| Retired / not looking for work | -0.0886 | 0.915 | -0.0232 | -0.0342 | -0.0342 |
|  | (0.581) | (0.531) | (0.0917) | (0.119) | (0.119) |
| Student | 0.588 | 1.800 | 0.0753 | 0.0918 | 0.0918 |
|  | (0.659) | (1.187) | (0.0691) | (0.0797) | (0.0797) |
| Unable to work | 2.245*** | 9.443*** | 0.261*** | 0.312*** | 0.312*** |
|  | (0.746) | (7.040) | (0.0776) | (0.0944) | (0.0944) |
| Unemployed and currently looking for work | 0.984 | 2.674 | 0.114* | 0.136* | 0.136* |
|  | (0.637) | (1.703) | (0.0661) | (0.0756) | (0.0756) |
| Marital Status e |  |  |  |  |  |
| Married or domestic partnership | -0.0184 | 0.982 | -0.000325 | 0.000723 | 0.000723 |
|  | (0.312) | (0.306) | (0.0441) | (0.0550) | (0.0550) |
| Widowed | 0.229 | 1.258 | 0.0566 | 0.0785 | 0.0785 |
|  | (0.883) | (1.110) | (0.0944) | (0.109) | (0.109) |
| Separated | - | - | 0.125 | 0.144 | 0.144 |
|  |  |  | (0.0773) | (0.0991) | (0.0991) |
| Divorced | -0.135 | 0.874 | -0.00324 | 0.00258 | 0.00258 |
|  | (0.543) | (0.475) | (0.0800) | (0.101) | (0.101) |
| Constant | 1.378 | 3.968 | 0.756*** | -0.297 | -0.297 |
|  | (1.306) | (5.183) | (0.204) | (0.266) | (0.266) |
|  |  |  |  |  |  |
| Observations | 709 | 709 | 715 | 715 | 715 |
| Pseudo R2 / R-squared | 0.1444 | 0.1444 | 0.134 |  | 0.0128 |
| Prob > chi2/Prob > F | 0.0002 | 0.0002 | 0.0000 | 0.0019 | 0.0019 |

a Reference category = 18-24, b Reference category = Less than $40,000, c Reference category = Some high school, d Reference category = Employed full-time (40 or more hours per week), e Reference category = Single, never married. Robust standard errors in parentheses *** p<0.01, ** p<0.05, * p<0.1 *Source: Analysis in STATA from original data collected by authors.*

**Table A2**

Correlates of using personal protective equipment (e.g., masks, gloves)

| Variables | Logit coeff | Odds ratio | OLS | Poisson | NBREG |
| --- | --- | --- | --- | --- | --- |
|  |  |  |  |  |  |
| Reliance on vertical ties | 1.471*** | 4.352*** | 0.0529*** | 0.0560*** | 0.0560*** |
|  | (0.294) | (1.279) | (0.0143) | (0.0155) | (0.0155) |
| Reliance on horizontal ties | 0.187 | 1.206 | 0.000104 | 6.04e-05 | 6.04e-05 |
|  | (0.259) | (0.312) | (0.00643) | (0.00663) | (0.00663) |
| Age a |  |  |  |  |  |
| 25-34 | -1.225 | 0.294 | -0.0350 | -0.0370 | -0.0370 |
|  | (1.333) | (0.391) | (0.0248) | (0.0259) | (0.0259) |
| 35-44 | -1.651 | 0.192 | -0.0436 | -0.0457 | -0.0457 |
|  | (1.381) | (0.265) | (0.0338) | (0.0355) | (0.0355) |
| 45-54 | -1.210 | 0.298 | -0.0499 | -0.0535 | -0.0535 |
|  | (1.333) | (0.397) | (0.0362) | (0.0384) | (0.0384) |
| 55-64 | -0.212 | 0.809 | -0.00871 | -0.0101 | -0.0101 |
|  | (1.271) | (1.029) | (0.0369) | (0.0391) | (0.0391) |
| 65-74 | 1.117 | 3.056 | 0.0408 | 0.0419 | 0.0419 |
|  | (1.485) | (4.539) | (0.0467) | (0.0492) | (0.0492) |
| 75+ | 1.569 | 4.800 | 0.0956 | 0.102 | 0.102 |
|  | (1.655) | (7.946) | (0.0826) | (0.0891) | (0.0891) |
| Income b |  |  |  |  |  |
| $40,001 --- $60,000 | 2.058*** | 7.827*** | 0.0762** | 0.0822** | 0.0822** |
|  | (0.785) | (6.144) | (0.0352) | (0.0391) | (0.0391) |
| $60,001 --- $80,000 | 1.628** | 5.094** | 0.0623 | 0.0674 | 0.0674 |
|  | (0.711) | (3.622) | (0.0411) | (0.0456) | (0.0456) |
| $80,001 --- $100,000 | 0.516 | 1.675 | 0.0150 | 0.0171 | 0.0171 |
|  | (0.688) | (1.153) | (0.0510) | (0.0566) | (0.0566) |
| $100,001 --- $120,000 | 3.244** | 25.65** | 0.0935** | 0.0998** | 0.0998** |
|  | (1.320) | (33.85) | (0.0372) | (0.0412) | (0.0412) |
| Over $120,001 | 2.082*** | 8.024*** | 0.0762** | 0.0817* | 0.0817* |
|  | (0.764) | (6.134) | (0.0384) | (0.0423) | (0.0423) |
| Education c |  |  |  |  |  |
| High school diploma | 0.107 | 1.113 | 0.0296 | 0.0404 | 0.0404 |
|  | (1.214) | (1.350) | (0.174) | (0.233) | (0.233) |
| Some college, no degree | 1.106 | 3.023 | 0.136 | 0.166 | 0.166 |
|  | (1.387) | (4.194) | (0.161) | (0.217) | (0.217) |
| Bachelor's degree | 0.438 | 1.549 | 0.114 | 0.143 | 0.143 |
|  | (1.221) | (1.892) | (0.158) | (0.213) | (0.213) |
| Master's degree / Professional degree / Doctoral degree | 1.265 | 3.544 | 0.135 | 0.165 | 0.165 |
|  | (1.221) | (4.326) | (0.158) | (0.213) | (0.213) |
| Female = Yes | -0.0499 | 0.951 | 0.00433 | 0.00481 | 0.00481 |
|  | (0.394) | (0.374) | (0.0179) | (0.0189) | (0.0189) |
| Minority = Yes | 0.294 | 1.342 | -0.00519 | -0.00624 | -0.00624 |
|  | (0.609) | (0.817) | (0.0265) | (0.0281) | (0.0281) |
| Democrat = Yes | -0.328 | 0.721 | -0.0147 | -0.0157 | -0.0157 |
|  | (0.441) | (0.318) | (0.0203) | (0.0213) | (0.0213) |
| Employment Status d |  |  |  |  |  |
| Employed part-time (up to 39 hours per week) | 0.197 | 1.218 | 0.0106 | 0.0112 | 0.0112 |
|  | (0.867) | (1.056) | (0.0253) | (0.0262) | (0.0262) |
| Furloughed | -0.668 | 0.513 | -0.0541 | -0.0601 | -0.0601 |
|  | (0.826) | (0.424) | (0.0533) | (0.0610) | (0.0610) |
| Homemaker | -0.252 | 0.777 | -0.0160 | -0.0167 | -0.0167 |
|  | (1.573) | (1.223) | (0.0926) | (0.103) | (0.103) |
| Retired / not looking for work | -1.498* | -0.223* | -0.0750 | -0.0799 | -0.0799 |
|  | (0.773) | (0.173) | (0.0606) | (0.0665) | (0.0665) |
| Student | - | - | 0.0468* | 0.0502* | 0.0502* |
|  |  |  | (0.0259) | (0.0284) | (0.0284) |
| Unable to work | -0.0417 | 0.959 | -0.0364 | -0.0416 | -0.0416 |
|  | (0.856) | (0.821) | (0.0711) | (0.0818) | (0.0818) |
| Unemployed and currently looking for work | 1.187 | 3.277 | 0.0385* | 0.0408** | 0.0408** |
|  | (1.069) | (3.503) | (0.0201) | (0.0208) | (0.0208) |
| Marital Status e |  |  |  |  |  |
| Married or domestic partnership | -0.833* | -0.435* | -0.0291 | -0.0302 | -0.0302 |
|  | (0.447) | (0.194) | (0.0241) | (0.0258) | (0.0258) |
| Widowed | - | - | 0.0542 | 0.0565 | 0.0565 |
|  |  |  | (0.0451) | (0.0477) | (0.0477) |
| Separated | - | - | 0.0544 | 0.0590 | 0.0590 |
|  |  |  | (0.0563) | (0.0614) | (0.0614) |
| Divorced | -0.650 | 0.522 | -0.0172 | -0.0179 | -0.0179 |
|  | (1.322) | (0.690) | (0.0567) | (0.0601) | (0.0601) |
| Constant | 3.365* | 28.94* | 0.825*** | -0.209 | -0.209 |
|  | (1.786) | (51.68) | (0.173) | (0.230) | (0.230) |
|  |  |  |  |  |  |
| Observations | 652 | 652 | 715 | 715 | 715 |
| Pseudo R2 / R-squared | 0.3412 | 0.3412 | 0.1448 |  | 0.0035 |
| Prob > chi2/Prob > F | 0.0000 | 0.0000 | 0.3888 | 0.5462 | 0.5462 |

a Reference category = 18-24, b Reference category = Less than $40,000, c Reference category = Some high school, d Reference category = Employed full-time (40 or more hours per week), e Reference category = Single, never married. Robust standard errors in parentheses *** p<0.01, ** p<0.05, * p<0.1 *Source: Analysis in STATA from original data collected by authors.*

**Table A3**

Correlates of increased frequency of handwashing

| Variables | Logit coeff | Odds ratio | OLS | Poisson | NBREG |
| --- | --- | --- | --- | --- | --- |
|  |  |  |  |  |  |
| Reliance on vertical ties | 0.737*** | 2.089*** | 0.0526*** | 0.0584*** | 0.0584*** |
|  | (0.200) | (0.417) | (0.0168) | (0.0190) | (0.0190) |
| Reliance on horizontal ties | 0.249 | 1.283 | 0.0100 | 0.0104 | 0.0104 |
|  | (0.235) | (0.302) | (0.0117) | (0.0125) | (0.0125) |
| Age a |  |  |  |  |  |
| 25-34 | 0.536 | 1.709 | 0.0318 | 0.0339 | 0.0339 |
|  | (0.661) | (1.131) | (0.0487) | (0.0532) | (0.0532) |
| 35-44 | 0.767 | 2.154 | 0.0446 | 0.0479 | 0.0479 |
|  | (0.785) | (1.691) | (0.0526) | (0.0569) | (0.0569) |
| 45-54 | -0.334 | 0.716 | -0.0431 | -0.0521 | -0.0521 |
|  | (0.733) | (0.525) | (0.0610) | (0.0688) | (0.0688) |
| 55-64 | 0.508 | 1.661 | 0.0374 | 0.0416 | 0.0416 |
|  | (0.824) | (1.370) | (0.0658) | (0.0723) | (0.0723) |
| 65-74 | 1.429 | 4.176 | 0.0984 | 0.107 | 0.107 |
|  | (1.095) | (4.573) | (0.0868) | (0.0950) | (0.0950) |
| 75+ | 3.069** | 21.53** | 0.216* | 0.239* | 0.239* |
|  | (1.322) | (28.47) | (0.118) | (0.136) | (0.136) |
| Income b |  |  |  |  |  |
| $40,001 --- $60,000 | 0.670 | 1.955 | 0.0660 | 0.0789 | 0.0789 |
|  | (0.589) | (1.152) | (0.0545) | (0.0634) | (0.0634) |
| $60,001 --- $80,000 | 1.165* | 3.207* | 0.0926 | 0.109 | 0.109 |
|  | (0.605) | (1.941) | (0.0572) | (0.0674) | (0.0674) |
| $80,001 --- $100,000 | 0.377 | 1.458 | 0.0308 | 0.0385 | 0.0385 |
|  | (0.737) | (1.074) | (0.0718) | (0.0830) | (0.0830) |
| $100,001 --- $120,000 | 2.578*** | 13.17*** | 0.156*** | 0.176** | 0.176** |
|  | (0.928) | (12.22) | (0.0592) | (0.0686) | (0.0686) |
| Over $120,001 | 1.360* | 3.897* | 0.106* | 0.123* | 0.123* |
|  | (0.730) | (2.845) | (0.0608) | (0.0700) | (0.0700) |
| Education c |  |  |  |  |  |
| High school diploma | 1.110 | 3.035 | 0.235 | 0.377 | 0.377 |
|  | (0.972) | (2.951) | (0.194) | (0.368) | (0.368) |
| Some college, no degree | 1.533* | 4.633* | 0.282 | 0.432 | 0.432 |
|  | (0.905) | (4.192) | (0.180) | (0.356) | (0.356) |
| Bachelor's degree | 1.019 | 2.770 | 0.240 | 0.385 | 0.385 |
|  | (0.832) | (2.304) | (0.180) | (0.355) | (0.355) |
| Master's degree / Professional degree / Doctoral degree | 0.899 | 2.458 | 0.232 | 0.376 | 0.376 |
|  | (0.886) | (2.179) | (0.181) | (0.356) | (0.356) |
| Female = Yes | 0.530 | 1.699 | 0.0426 | 0.0475 | 0.0475 |
|  | (0.335) | (0.569) | (0.0271) | (0.0301) | (0.0301) |
| Minority = Yes | -0.129 | 0.879 | -0.00532 | -0.00481 | -0.00481 |
|  | (0.447) | (0.392) | (0.0385) | (0.0428) | (0.0428) |
| Democrat = Yes | 0.285 | 1.330 | 0.0246 | 0.0280 | 0.0280 |
|  | (0.350) | (0.466) | (0.0271) | (0.0299) | (0.0299) |
| Employment Status d |  |  |  |  |  |
| Employed part-time (up to 39 hours per week) | 0.937 | 2.553 | 0.0449 | 0.0479 | 0.0479 |
|  | (0.726) | (1.853) | (0.0341) | (0.0362) | (0.0362) |
| Furloughed | -0.307 | 0.736 | -0.0543 | -0.0707 | -0.0707 |
|  | (0.593) | (0.436) | (0.0606) | (0.0751) | (0.0751) |
| Homemaker | 1.740 | 5.696 | 0.118 | 0.132 | 0.132 |
|  | (1.743) | (9.927) | (0.0963) | (0.104) | (0.104) |
| Retired / not looking for work | -0.535 | 0.586 | -0.0763 | -0.0892 | -0.0892 |
|  | (0.660) | (0.387) | (0.0778) | (0.0916) | (0.0916) |
| Student | 0.711 | 2.036 | 0.0640 | 0.0748 | 0.0748 |
|  | (0.882) | (1.795) | (0.0518) | (0.0567) | (0.0567) |
| Unable to work | 0.960 | 2.611 | 0.0557 | 0.0622 | 0.0622 |
|  | (0.921) | (2.405) | (0.0819) | (0.0921) | (0.0921) |
| Unemployed and currently looking for work | 0.712 | 2.038 | 0.0461 | 0.0509 | 0.0509 |
|  | (0.693) | (1.412) | (0.0450) | (0.0484) | (0.0484) |
| Marital Status e |  |  |  |  |  |
| Married or domestic partnership | -0.530 | 0.589 | -0.0412 | -0.0467 | -0.0467 |
|  | (0.483) | (0.284) | (0.0339) | (0.0369) | (0.0369) |
| Widowed | -2.637** | 0.0715** | -0.248* | -0.298 | -0.298 |
|  | (1.049) | (0.0750) | (0.146) | (0.196) | (0.196) |
| Separated | -1.632 | 0.196 | -0.137 | -0.152 | -0.152 |
|  | (1.165) | (0.228) | (0.210) | (0.276) | (0.276) |
| Divorced | -0.626 | 0.535 | -0.0637 | -0.0736 | -0.0736 |
|  | (0.736) | (0.394) | (0.0745) | (0.0867) | (0.0867) |
| Constant | 0.0689 | 1.071 | 0.550*** | -0.619* | -0.619* |
|  | (1.066) | (1.142) | (0.184) | (0.361) | (0.361) |
|  |  |  |  |  |  |
| Observations | 715 | 715 | 715 | 715 | 715 |
| Pseudo R2 / R-squared | 0.1938 | 0.1938 | 0.128 |  | 0.0062 |
| Prob > chi2/Prob > F | 0.0001 | 0.0001 | 0.0482 | 0.2222 | 0.2222 |

a Reference category = 18-24, b Reference category = Less than $40,000, c Reference category = Some high school, d Reference category = Employed full-time (40 or more hours per week), e Reference category = Single, never married. Robust standard errors in parentheses *** p<0.01, ** p<0.05, * p<0.1 *Source: Analysis in STATA from original data collected by authors.*

**Table A4**

Correlates of Government Trust and Eating Indoors at Restaurants During the COVID-19 Pandemic

| Variables | Odds Ratio |
| --- | --- |
|  |  |
| Trust in government officials | -0.589*** |
|  | (0.0673) |
| Age | -0.996 |
|  | (0.00484) |
| Race a |  |
| Black, alone | -0.523** |
|  | (0.109) |
| Asian, alone | 1.350 |
|  | (0.674) |
| Any other race alone, or race in combination | -0.831 |
|  | (0.169) |
| Education b |  |
| Some high school | 1.539 |
|  | (0.687) |
| High school graduate or equivalent (for example GED) | 1.383 |
|  | (0.530) |
| Some college, but degree not received or is in progress | 2.027 |
|  | (0.768) |
| Associate’s degree (for example AA, AS) | 2.495* |
|  | (0.979) |
| Bachelor’s degree (for example BA, BS, AB) | 2.874** |
|  | (1.113) |
| Graduate degree (for example master’s, professional, doctorate) | 2.656* |
|  | (1.061) |
| Gender c |  |
| Female | -0.679*** |
|  | (0.0776) |
| Transgender | -0.364 |
|  | (0.234) |
| Marital Status d |  |
| Widowed | 1.090 |
|  | (0.258) |
| Divorced | 1.024 |
|  | (0.179) |
| Separated | -0.480* |
|  | (0.150) |
| Never married | 1.205 |
|  | (0.201) |
| Have Children | -0.781 |
|  | (0.100) |
| Income e |  |
| $25,000 - $34,999 | -0.890 |
|  | (0.179) |
| $35,000 - $49,999 | 1.841** |
|  | (0.392) |
| $50,000 - $74,999 | 1.813** |
|  | (0.350) |
| $75,000 - $99,999 | 2.939*** |
|  | (0.635) |
| $100,000 - $149,999 | 3.881*** |
|  | (0.952) |
| $150,000 - $199,999 | 4.690*** |
|  | (1.479) |
| $200,000 and above | 5.129*** |
| Employed | 1.509** |
|  | (0.190) |
| Constant | -0.574 |
|  | (0.282) |
|  |  |
| Prob > chi2 | 0.0000 |
| Pseudo R2 | 0.1414 |
| VIF | 2.01 |
| Observations | 5,275 |
| *** p<0.001, ** p<0.01, * p<0.05  Weighted by the person level weight provided in the Household Pulse Survey: Measuring Social and Economic Impacts during the Coronavirus Pandemic dataset.. a Reference category = White, Alone. b Reference category = Less than high school. c Reference category = Male. d Reference category = Now married. e Reference category = Less than $25,000  Table A4 show the results of a logistic regression of the association between trust in government officials and eating indoors at restaurants during the COVID-19 pandemic. To measure trust in government officials, we used a response to the following question: “Which of the following, if any, are reasons that you [only probably will /probably won’t/definitely won’t/ are unsure about whether to] [get a COVID-19 vaccine/won’t receive all required doses of a COVID-19 vaccine]? (Select all that apply).” We coded our *trust in government officials* variable 0 if individuals responded, “I don’t trust the government.” We coded *trust in government officials* variable 1 if individuals saw the question, but the response “I don’t trust the government” was not selected. To measure behavioral change during the COVID-19 pandemic, we used responses the following question: “In the last 7 days, have you or your household done any of the following… Eating indoors at restaurants?” “Yes” responses were coded 1 and “No” responses were coded 0. As our findings suggest, we see the odds of eating indoors at restaurants during the pandemic are predicted to be 0.670 times less (p < 0.001) among those who trusted government officials, versus those who indicated they did not trust the government.  *Source: Analysis in STATA based on data from the U.S. Census Bureau Household Pulse Survey: Measuring Social and Economic Impacts during the Coronavirus Pandemic.* | |

**Table A4**

Matching U.S. Counties

| **County** | **State** | **% Bachelor's degree or higher, 2021** | **Median Household Income, 2021** | **% White alone, 2021** | **# Total Population, 2021** |
| --- | --- | --- | --- | --- | --- |
| Madison County | AL | 42.99 | $65,910.83 | 66.72 | 369597 |
| Shelby County | AL | 42.86 | $78,380.47 | 78.57 | 218625 |
| Denali Borough | AK | 46.08 | $83,599.02 | 80.38 | 2385 |
| Juneau City and Borough | AK | 38.41 | $90,007.18 | 66.50 | 32088 |
| Sitka City and Borough | AK | 33.17 | $73,260.83 | 63.27 | 8495 |
| Benton County | AR | 33.95 | $67,324.33 | 86.50 | 279547 |
| El Dorado County | CA | 34.53 | $84,534.46 | 86.64 | 191707 |
| Marin County | CA | 59.35 | $117,325.57 | 75.70 | 261402 |
| Napa County | CA | 35.93 | $90,201.55 | 71.56 | 139800 |
| Nevada County | CA | 37.76 | $66,625.56 | 90.88 | 99597 |
| Placer County | CA | 40.25 | $90,179.81 | 80.69 | 394673 |
| San Diego County | CA | 39.07 | $79,855.44 | 69.38 | 3370146 |
| San Luis Obispo County | CA | 35.24 | $74,762.44 | 84.57 | 285416 |
| Santa Barbara County | CA | 33.99 | $75,198.02 | 77.14 | 450298 |
| Santa Cruz County | CA | 40.46 | $83,108.85 | 70.44 | 277121 |
| Sonoma County | CA | 35.45 | $82,280.13 | 71.31 | 504291 |
| Ventura County | CA | 33.80 | $88,340.73 | 79.46 | 852575 |
| Yolo County | CA | 41.54 | $71,131.59 | 68.41 | 222533 |
| Arapahoe County | CO | 42.98 | $78,512.95 | 69.56 | 663399 |
| Boulder County | CO | 61.53 | $83,260.51 | 87.88 | 329673 |
| Broomfield County | CO | 56.53 | $95,762.44 | 84.89 | 71505 |
| Clear Creek County | CO | 50.29 | $68,452.40 | 93.90 | 9645 |
| Denver County | CO | 49.18 | $69,224.50 | 74.59 | 734867 |
| Douglas County | CO | 57.96 | $121,045.43 | 87.39 | 350365 |
| Eagle County | CO | 46.36 | $88,392.31 | 88.08 | 55916 |
| Elbert County | CO | 38.36 | $101,047.13 | 92.04 | 26567 |
| El Paso County | CO | 39.04 | $69,152.80 | 77.94 | 720782 |
| Gilpin County | CO | 42.04 | $78,299.76 | 91.33 | 6226 |
| Grand County | CO | 37.55 | $72,207.27 | 94.43 | 15757 |
| Jefferson County | CO | 45.51 | $83,477.73 | 89.28 | 586692 |
| La Plata County | CO | 43.55 | $68,149.31 | 86.31 | 56863 |
| Larimer County | CO | 47.34 | $72,239.57 | 90.50 | 357896 |
| Ouray County | CO | 44.60 | $65,343.71 | 97.11 | 4882 |
| Pitkin County | CO | 61.62 | $76,626.95 | 88.13 | 18260 |
| Routt County | CO | 49.23 | $78,093.47 | 94.88 | 25909 |
| San Miguel County | CO | 58.82 | $68,205.97 | 94.23 | 8232 |
| Summit County | CO | 52.01 | $80,728.54 | 89.18 | 31633 |
| Teller County | CO | 38.29 | $67,505.79 | 93.72 | 25047 |
| Fairfield County | CT | 47.48 | $96,652.26 | 71.41 | 947696 |
| Hartford County | CT | 38.01 | $75,461.53 | 68.70 | 892577 |
| Litchfield County | CT | 35.57 | $80,835.85 | 91.29 | 179901 |
| Middlesex County | CT | 41.51 | $86,427.25 | 86.56 | 161909 |
| New Haven County | CT | 34.74 | $70,156.16 | 71.24 | 856092 |
| New London County | CT | 33.43 | $73,890.08 | 78.76 | 264555 |
| Tolland County | CT | 42.46 | $87,271.25 | 86.43 | 150637 |
| New Castle County | DE | 35.81 | $74,057.18 | 62.83 | 560705 |
| Collier County | FL | 37.21 | $70,075.54 | 87.84 | 386859 |
| Monroe County | FL | 34.82 | $71,051.66 | 86.58 | 75990 |
| St. Johns County | FL | 44.86 | $83,102.90 | 87.40 | 261322 |
| Seminole County | FL | 40.52 | $67,151.76 | 73.47 | 473372 |
| Bryan County | GA | 33.55 | $73,967.83 | 75.59 | 38859 |
| Cherokee County | GA | 38.50 | $83,978.85 | 84.80 | 258148 |
| Columbia County | GA | 35.55 | $81,831.58 | 72.63 | 158123 |
| Fayette County | GA | 47.05 | $91,077.60 | 64.25 | 114094 |
| Forsyth County | GA | 54.68 | $108,128.24 | 76.65 | 244061 |
| Oconee County | GA | 54.42 | $92,635.76 | 87.41 | 39882 |
| Ada County | ID | 38.29 | $66,635.64 | 88.98 | 475843 |
| Teton County | ID | 42.06 | $74,684.49 | 86.38 | 11971 |
| DuPage County | IL | 49.28 | $93,273.88 | 74.48 | 930121 |
| Kane County | IL | 33.19 | $80,008.73 | 71.72 | 535731 |
| Kendall County | IL | 36.29 | $96,791.97 | 80.00 | 129104 |
| Lake County | IL | 45.50 | $90,056.54 | 72.78 | 702223 |
| McHenry County | IL | 34.38 | $87,805.30 | 91.45 | 308165 |
| McLean County | IL | 44.38 | $67,851.28 | 81.76 | 172636 |
| Monroe County | IL | 37.17 | $86,051.85 | 96.71 | 34413 |
| Will County | IL | 34.32 | $87,454.71 | 71.54 | 692606 |
| Woodford County | IL | 34.24 | $73,763.15 | 96.03 | 38490 |
| Boone County | IN | 51.90 | $84,993.51 | 91.59 | 68254 |
| Hamilton County | IN | 59.67 | $98,688.48 | 85.52 | 336122 |
| Hendricks County | IN | 37.99 | $82,313.26 | 85.40 | 168773 |
| Johnson County | IN | 34.17 | $72,506.12 | 89.32 | 157626 |
| Dallas County | IA | 52.28 | $89,294.64 | 89.59 | 93123 |
| Linn County | IA | 33.72 | $66,096.20 | 85.98 | 227536 |
| Polk County | IA | 36.23 | $68,346.56 | 82.18 | 494370 |
| Warren County | IA | 33.70 | $78,486.57 | 95.12 | 51259 |
| Johnson County | KS | 56.19 | $89,530.45 | 84.37 | 603993 |
| Pottawatomie County | KS | 34.98 | $67,346.41 | 93.33 | 24453 |
| Wallace County | KS | 35.08 | $66,021.88 | 90.98 | 1563 |
| Oldham County | KY | 43.30 | $101,247.45 | 90.90 | 67521 |
| St. Tammany Parish | LA | 34.81 | $69,911.41 | 81.35 | 261221 |
| Cumberland County | ME | 48.36 | $73,999.63 | 90.36 | 295396 |
| Sagadahoc County | ME | 37.57 | $65,454.39 | 94.71 | 35566 |
| Anne Arundel County | MD | 42.24 | $101,462.58 | 70.77 | 579701 |
| Calvert County | MD | 32.98 | $109,427.89 | 80.06 | 92151 |
| Carroll County | MD | 36.98 | $97,411.13 | 90.00 | 167703 |
| Frederick County | MD | 41.34 | $97,603.38 | 79.42 | 256209 |
| Harford County | MD | 37.16 | $89,244.85 | 77.11 | 253529 |
| Queen Anne's County | MD | 35.93 | $96,797.82 | 88.63 | 50157 |
| Talbot County | MD | 41.93 | $73,743.87 | 82.76 | 36773 |
| Barnstable County | MA | 43.90 | $74,732.12 | 89.70 | 212690 |
| Dukes County | MA | 45.84 | $73,122.80 | 84.27 | 17499 |
| Essex County | MA | 39.91 | $79,656.68 | 79.09 | 795281 |
| Hampshire County | MA | 48.41 | $70,879.86 | 86.16 | 161304 |
| Middlesex County | MA | 56.22 | $103,357.80 | 74.46 | 1627337 |
| Nantucket County | MA | 55.13 | $110,549.12 | 86.32 | 11539 |
| Norfolk County | MA | 53.52 | $104,591.57 | 75.10 | 707388 |
| Plymouth County | MA | 38.03 | $90,491.58 | 80.96 | 520867 |
| Worcester County | MA | 36.51 | $75,158.42 | 81.69 | 832511 |
| Leelanau County | MI | 45.39 | $66,783.67 | 92.33 | 21532 |
| Livingston County | MI | 35.73 | $84,301.07 | 95.55 | 192310 |
| Oakland County | MI | 47.31 | $80,588.10 | 73.45 | 1267331 |
| Ottawa County | MI | 34.74 | $70,467.08 | 88.08 | 293829 |
| Washtenaw County | MI | 55.98 | $73,273.61 | 72.70 | 375044 |
| Carver County | MN | 49.93 | $102,744.75 | 90.94 | 105101 |
| Clay County | MN | 34.77 | $66,557.11 | 88.60 | 64727 |
| Dakota County | MN | 42.46 | $86,727.76 | 79.92 | 427951 |
| Hennepin County | MN | 49.93 | $78,646.69 | 69.78 | 1271558 |
| Nicollet County | MN | 33.30 | $67,952.30 | 90.61 | 34422 |
| Olmsted County | MN | 45.62 | $77,775.84 | 81.73 | 157723 |
| Ramsey County | MN | 42.03 | $65,281.43 | 63.87 | 554164 |
| Scott County | MN | 40.01 | $102,694.82 | 81.95 | 149300 |
| Washington County | MN | 44.44 | $97,191.87 | 83.93 | 260373 |
| Clay County | MO | 33.63 | $71,088.95 | 83.06 | 248384 |
| Platte County | MO | 43.33 | $81,199.00 | 83.18 | 104326 |
| St. Charles County | MO | 39.72 | $85,773.86 | 88.54 | 404450 |
| St. Louis County | MO | 43.52 | $67,864.28 | 66.36 | 995399 |
| Gallatin County | MT | 49.86 | $66,138.78 | 92.83 | 114262 |
| Jefferson County | MT | 35.14 | $70,068.13 | 93.37 | 12087 |
| Lewis and Clark County | MT | 39.64 | $66,010.23 | 92.50 | 68897 |
| Douglas County | NE | 39.87 | $65,119.52 | 77.73 | 572310 |
| Sarpy County | NE | 41.22 | $83,103.00 | 85.90 | 187273 |
| Belknap County | NH | 33.53 | $70,593.30 | 95.38 | 61030 |
| Cheshire County | NH | 33.26 | $65,200.60 | 94.03 | 75952 |
| Grafton County | NH | 40.57 | $65,076.53 | 90.87 | 90082 |
| Hillsborough County | NH | 38.10 | $82,110.54 | 87.74 | 417589 |
| Merrimack County | NH | 35.46 | $76,055.70 | 92.89 | 151280 |
| Rockingham County | NH | 41.80 | $94,461.04 | 93.63 | 310456 |
| Strafford County | NH | 35.88 | $74,519.29 | 91.47 | 131030 |
| Bergen County | NJ | 48.29 | $101,472.71 | 70.37 | 934113 |
| Burlington County | NJ | 38.29 | $88,046.48 | 70.58 | 442982 |
| Cape May County | NJ | 32.99 | $67,447.89 | 90.40 | 91655 |
| Gloucester County | NJ | 33.89 | $88,319.15 | 79.80 | 291738 |
| Hunterdon County | NJ | 53.53 | $116,158.88 | 89.32 | 124105 |
| Mercer County | NJ | 43.03 | $82,251.78 | 61.92 | 367804 |
| Monmouth County | NJ | 46.14 | $100,692.42 | 80.98 | 618319 |
| Morris County | NJ | 54.26 | $116,519.24 | 80.25 | 491220 |
| Somerset County | NJ | 54.45 | $115,176.16 | 64.75 | 329907 |
| Sussex County | NJ | 36.18 | $94,157.10 | 91.28 | 139079 |
| Warren County | NJ | 33.64 | $81,941.48 | 86.99 | 105301 |
| Los Alamos County | NM | 66.60 | $122,160.06 | 83.31 | 18902 |
| Albany County | NY | 42.38 | $66,603.25 | 73.02 | 307084 |
| Dutchess County | NY | 35.15 | $81,506.37 | 76.19 | 291890 |
| Nassau County | NY | 45.77 | $116,857.31 | 65.63 | 1359053 |
| Ontario County | NY | 37.08 | $65,879.88 | 91.27 | 109687 |
| Putnam County | NY | 39.46 | $104,973.27 | 83.88 | 98547 |
| Richmond County | NY | 34.30 | $82,848.35 | 72.32 | 476523 |
| Rockland County | NY | 39.95 | $93,718.11 | 69.35 | 326698 |
| Saratoga County | NY | 41.98 | $85,198.39 | 91.36 | 231004 |
| Suffolk County | NY | 36.40 | $101,212.06 | 79.00 | 1476612 |
| Westchester County | NY | 47.99 | $97,337.61 | 62.18 | 971196 |
| Cabarrus County | NC | 33.85 | $68,291.41 | 67.84 | 215343 |
| Chatham County | NC | 44.19 | $67,148.65 | 80.82 | 72671 |
| Orange County | NC | 58.20 | $72,641.68 | 73.98 | 147813 |
| Union County | NC | 35.68 | $80,437.13 | 80.29 | 239912 |
| Wake County | NC | 53.02 | $81,484.95 | 63.72 | 1116519 |
| Burleigh County | ND | 36.33 | $71,776.10 | 89.05 | 98464 |
| Cass County | ND | 41.44 | $65,450.00 | 84.72 | 184750 |
| Steele County | ND | 36.48 | $72,007.05 | 97.70 | 1692 |
| Delaware County | OH | 54.87 | $108,894.31 | 85.71 | 208886 |
| Geauga County | OH | 38.11 | $83,154.01 | 96.03 | 93870 |
| Greene County | OH | 39.63 | $69,863.00 | 84.67 | 167573 |
| Medina County | OH | 34.83 | $77,390.67 | 94.30 | 179599 |
| Union County | OH | 38.34 | $89,133.35 | 89.87 | 58164 |
| Warren County | OH | 43.78 | $87,718.69 | 86.97 | 233458 |
| Cleveland County | OK | 33.57 | $65,046.79 | 75.70 | 284587 |
| Clackamas County | OR | 38.82 | $81,444.10 | 85.77 | 421272 |
| Deschutes County | OR | 35.64 | $68,659.91 | 92.23 | 195563 |
| Multnomah County | OR | 46.23 | $69,740.34 | 76.14 | 824797 |
| Washington County | OR | 45.14 | $83,295.97 | 73.67 | 606444 |
| Bucks County | PA | 42.33 | $89,803.19 | 86.07 | 626731 |
| Butler County | PA | 37.25 | $71,628.15 | 94.98 | 187427 |
| Chester County | PA | 53.34 | $101,315.05 | 83.39 | 524500 |
| Cumberland County | PA | 37.68 | $71,932.30 | 85.88 | 253324 |
| Delaware County | PA | 39.46 | $75,044.74 | 66.87 | 566102 |
| Montgomery County | PA | 49.30 | $91,978.03 | 77.43 | 829382 |
| Bristol County | RI | 48.46 | $81,605.93 | 93.18 | 48558 |
| Kent County | RI | 33.30 | $73,922.67 | 89.47 | 163036 |
| Newport County | RI | 48.03 | $80,632.30 | 88.60 | 83211 |
| Washington County | RI | 45.38 | $85,959.94 | 91.51 | 125943 |
| Beaufort County | SC | 41.04 | $67,947.61 | 74.21 | 193641 |
| York County | SC | 34.14 | $66,191.21 | 73.05 | 278223 |
| Hughes County | SD | 35.48 | $65,061.97 | 83.45 | 17709 |
| Lincoln County | SD | 36.61 | $83,893.92 | 93.70 | 60200 |
| Stanley County | SD | 33.76 | $74,318.77 | 88.60 | 3044 |
| Williamson County | TN | 60.72 | $114,180.76 | 87.88 | 238207 |
| Wilson County | TN | 33.01 | $76,518.45 | 86.49 | 143448 |
| Borden County | TX | 40.94 | $77,156.80 | 96.32 | 570 |
| Collin County | TX | 52.23 | $98,004.61 | 66.77 | 1028746 |
| Comal County | TX | 36.83 | $80,815.45 | 89.73 | 151894 |
| Denton County | TX | 45.80 | $87,574.03 | 72.38 | 884274 |
| Hays County | TX | 36.97 | $69,313.95 | 88.65 | 231150 |
| Kendall County | TX | 41.39 | $86,370.13 | 88.07 | 46801 |
| Montgomery County | TX | 35.27 | $81,636.13 | 85.13 | 606332 |
| Rockwall County | TX | 41.91 | $100,760.75 | 83.98 | 102519 |
| Travis County | TX | 49.95 | $76,825.70 | 70.20 | 1281959 |
| Williamson County | TX | 41.52 | $88,131.02 | 77.82 | 583222 |
| Davis County | UT | 38.60 | $83,901.79 | 89.16 | 357252 |
| Morgan County | UT | 41.66 | $94,366.50 | 95.95 | 12407 |
| Salt Lake County | UT | 36.07 | $75,644.71 | 75.74 | 1161591 |
| Summit County | UT | 55.55 | $103,758.60 | 91.50 | 42500 |
| Utah County | UT | 41.46 | $74,990.69 | 90.44 | 631044 |
| Wasatch County | UT | 42.65 | $85,202.69 | 93.45 | 34307 |
| Addison County | VT | 39.58 | $68,592.50 | 92.69 | 36859 |
| Chittenden County | VT | 51.11 | $73,232.31 | 88.62 | 164146 |
| Grand Isle County | VT | 41.63 | $72,276.11 | 92.42 | 7031 |
| Albemarle County | VA | 54.76 | $79,825.60 | 80.85 | 109517 |
| Arlington County | VA | 73.47 | $121,523.42 | 69.73 | 238868 |
| Chesterfield County | VA | 41.47 | $83,410.78 | 66.22 | 351065 |
| Fauquier County | VA | 37.14 | $100,992.56 | 85.56 | 70795 |
| Fluvanna County | VA | 35.40 | $78,134.29 | 79.86 | 26767 |
| Goochland County | VA | 42.75 | $94,983.16 | 80.44 | 23355 |
| Hanover County | VA | 41.00 | $91,361.76 | 85.15 | 107606 |
| James City County | VA | 50.60 | $87,804.11 | 79.62 | 77230 |
| King George County | VA | 36.38 | $93,239.74 | 78.43 | 26864 |
| Loudoun County | VA | 61.42 | $142,796.37 | 63.38 | 417967 |
| Rappahannock County | VA | 33.50 | $74,599.28 | 88.11 | 7307 |
| Roanoke County | VA | 35.27 | $68,724.86 | 86.13 | 93746 |
| Stafford County | VA | 40.97 | $111,852.37 | 65.52 | 151215 |
| York County | VA | 47.43 | $93,332.28 | 72.66 | 68707 |
| Alexandria city | VA | 61.42 | $101,219.04 | 60.46 | 162574 |
| Fairfax city | VA | 59.95 | $116,403.05 | 65.38 | 23801 |
| Falls Church city | VA | 74.92 | $127,229.93 | 79.90 | 14633 |
| Fredericksburg city | VA | 42.51 | $67,069.90 | 60.33 | 29323 |
| Poquoson city | VA | 44.06 | $99,398.98 | 92.81 | 12058 |
| Virginia Beach city | VA | 36.21 | $77,321.82 | 64.47 | 451373 |
| Island County | WA | 33.92 | $68,491.80 | 83.04 | 84292 |
| King County | WA | 52.87 | $96,084.29 | 61.23 | 2273716 |
| Kitsap County | WA | 33.68 | $76,030.02 | 79.42 | 270385 |
| Snohomish County | WA | 33.18 | $87,953.14 | 72.64 | 825496 |
| Thurston County | WA | 36.48 | $72,860.20 | 79.77 | 287602 |
| Dane County | WI | 51.93 | $74,440.18 | 82.47 | 549069 |
| Ozaukee County | WI | 49.33 | $85,801.05 | 92.25 | 89242 |
| St. Croix County | WI | 35.77 | $85,849.05 | 94.91 | 89895 |
| Waukesha County | WI | 45.29 | $87,943.85 | 90.59 | 403749 |
| Teton County | WY | 55.88 | $86,264.14 | 85.51 | 23789 |
| *Data source: SimplyAnalytics & US Census Bureau American Community Survey Data* | | | | | |

Please choose one adult member of your household over the age of 18 to complete this survey on behalf of all family or household members. Your responses will be kept confidential and anonymous. Thank you for taking the time to answer this survey. **We are offering a $15 Amazon.com gift card for every 10th completed survey response. Please return by Monday, June 15th.**

| **SECTION 1: Accessing COVID-19 Information** |
| --- |

**1. Which of the following sources have you relied on for information during the COVID-19 outbreak?** *Please check all options that apply.*

|  | Local elected officials (e.g., mayor of your city) |  | Employer | |
| --- | --- | --- | --- | --- |
|  | Local government agencies (e.g., local health department) |  | Coworkers or colleagues | |
|  | Local K-12 school district |  | University or college | |
|  | State elected officials (e.g., Governor Cuomo / Baker) |  | Community organizations and groups (e.g., church, temple, mosque, neighborhood, hobby, or recreational) | |
|  | State government agencies (e.g., state health department) |
|  | Federal elected officials (e.g., President Trump) |  | Friends | |
|  | Federal government leaders (e.g., Dr. Fauci) |  | Neighbors | |
|  | Center for Disease Control (CDC) or National Institute of Health (NIH) |  | Family | |
|  | The World Health Organization (WHO) |  | Other: |  |

**2. "How do you access these sources of information?"** *Please check all options that apply.*

|  | | TV | Radio | National News Source | Local Newspaper | Official Website | Facebook | Twitter | Nextdoor | Phone or Video Call | In-Person Conversation | Email |
| --- | --- | --- | --- | --- | --- | --- | --- | --- | --- | --- | --- | --- |
| Local elected officials | |  |  |  |  |  |  |  |  |  |  |  |
| Local government agencies | |  |  |  |  |  |  |  |  |  |  |  |
| Local K-12 school district | |  |  |  |  |  |  |  |  |  |  |  |
| State elected officials | |  |  |  |  |  |  |  |  |  |  |  |
| State government agencies | |  |  |  |  |  |  |  |  |  |  |  |
| Federal elected officials | |  |  |  |  |  |  |  |  |  |  |  |
| Federal government leaders | |  |  |  |  |  |  |  |  |  |  |  |
| CDC or NIH | |  |  |  |  |  |  |  |  |  |  |  |
| WHO | |  |  |  |  |  |  |  |  |  |  |  |
| Employer | |  |  |  |  |  |  |  |  |  |  |  |
| Coworkers or colleagues | |  |  |  |  |  |  |  |  |  |  |  |
| University or college | |  |  |  |  |  |  |  |  |  |  |  |
| Community organizations and groups | |  |  |  |  |  |  |  |  |  |  |  |
| Friends | |  |  |  |  |  |  |  |  |  |  |  |
| Neighbors | |  |  |  |  |  |  |  |  |  |  |  |
| Family | |  |  |  |  |  |  |  |  |  |  |  |
| Other: |  |  |  |  |  |  |  |  |  |  |  |  |

**3. How much do you trust these sources for information related to COVID-19?**

|  | | Fully | A lot | Some | A little | Not at all |
| --- | --- | --- | --- | --- | --- | --- |
| Local elected officials | |  |  |  |  |  |
| Local government agencies | |  |  |  |  |  |
| State elected officials | |  |  |  |  |  |
| State government agencies | |  |  |  |  |  |
| Federal government leaders | |  |  |  |  |  |
| Federal elected officials | |  |  |  |  |  |
| CDC or NIH | |  |  |  |  |  |
| Community organizations and groups | |  |  |  |  |  |
| Employer | |  |  |  |  |  |
| Local K-12 school district | |  |  |  |  |  |
| University or college | |  |  |  |  |  |
| WHO | |  |  |  |  |  |
| Friends | |  |  |  |  |  |
| Neighbors | |  |  |  |  |  |
| Family | |  |  |  |  |  |
| Coworkers or colleagues | |  |  |  |  |  |
| Other: |  |  |  |  |  |  |

**4. When deciding who to trust for information related to COVID-19, please indicate how you would weigh each of the following from "Very Important" to "Unimportant":**

|  | | Very Important | Important | Moderately Important | Slightly Important | Unimportant |
| --- | --- | --- | --- | --- | --- | --- |
| The information is coming from someone I know. | |  |  |  |  |  |
| The information is coming from someone with an advanced degree in medicine or health. | |  |  |  |  |  |
| The information is coming from an elected official. | |  |  |  |  |  |
| The information is coming from someone leading an agency. | |  |  |  |  |  |
| Other: |  |  |  |  |  |  |

| **SECTION 2: COVID-19 Related Behavioral Change** |
| --- |

**5. To what extent are you currently practicing physical distancing concerning who enters your home?**

|  | Only members of my household enter my home. |
| --- | --- |
|  | Outside of my household, only a few close friends and family now enter my home. |
|  | I have made no changes concerning who enters my home. |

**6. To what extent are you currently practicing physical distancing concerning how often you leave your home?** *Please check all options that apply.*

|  | I go out as frequently as I did before |  | I go out to visit close friends and family | |
| --- | --- | --- | --- | --- |
|  | I go out for essentials only (e.g., job, groceries, medicine) |  | I do not go out at all | |
|  | I go out for exercise |  | Other: |  |

**7. Please indicate any changes in your behavior due to COVID-19 or related stay in place orders.**

*Please check all options that apply.*

|  | Started working from home or remotely |  | Met with a doctor or mental health professional via a web or phone Telehealth technology | |
| --- | --- | --- | --- | --- |
|  | Started using personal protective equipment (e.g., masks, gloves) |  | Skipped or rescheduled doctor's appointments, hospital visits, and checkups | |
|  | Ordered more goods online |  | Increased use of bleach, Lysol, or other cleaning agents to sanitize surfaces in my home | |
|  | Avoided going to public places |  | Eat nutritious foods/supplements to boost your immunity | |
|  | Increased frequency of handwashing |  | Stopped taking public transportation | |
|  | Increased reliance on individuals in your network |  | Other: |  |

**8. Please indicate the frequency for each action, from "Always" to "Never," you've taken during the COVID-19 crisis:**

|  | | Always | Often | Sometimes | Rarely | Never | Does Not Apply |
| --- | --- | --- | --- | --- | --- | --- | --- |
| Wear a mask when going to grocery shopping. | |  |  |  |  |  |  |
| Wear a mask when going for a walk in your neighborhood. | |  |  |  |  |  |  |
| Wear a mask in your home. | |  |  |  |  |  |  |
| Wear a mask when working at your essential job. | |  |  |  |  |  |  |
| Wash your hands as soon as you can after touching surfaces outside. | |  |  |  |  |  |  |
| Online shop for groceries. | |  |  |  |  |  |  |
| Online shop for non-essential items. | |  |  |  |  |  |  |
| Other: |  |  |  |  |  |  |  |

**9. Please indicate the actions you have taken since COVID-19 started.** *Check all options that apply.*

|  | Reached out to my neighbors | |
| --- | --- | --- |
|  | Helped my neighbors | |
|  | Reached out to friends who do not live nearby | |
|  | Reached out to family who do not live nearby | |
|  | Joined online community groups | |
|  | Joined groups advocating for a quicker reopening of the US economy | |
|  | Participated in in-person volunteer activities related to the COVID-19 response | |
|  | Made masks to give to your friends, family, or neighbors | |
|  | Donated handmade or manufactured masks, or other personal protective equipment to healthcare workers | |
|  | Donated money to the COVID-19 response | |
|  | Donated blood | |
|  | Donated time to help others who are at high-risk (e.g., shopped for and delivered groceries, helped with home maintenance) | |
|  | Other: |  |

| **10. Did you participate in any groups or organizations before the COVID-19 outbreak?** *Examples could include a**church, temple, mosque, charity, cultural, educational, neighborhood, HOA/POA, hobby, and/or recreational group.* |  |  |
| --- | --- | --- |
| Yes | No |

**11. If you answered "Yes" to the previous question, please indicate which charities, cultural, educational, neighborhood, recreational, and/or religious groups in which you or your family members are involved.** *For example: "Asian American Civic Association, 87 Tyler Street, 5th floor, Boston, MA 02111"*

| Name of the group or organization | How many hours do you participate in the group's activities? | | | | | |
| --- | --- | --- | --- | --- | --- | --- |
|  | 1 | 2 | 3 | 4 | 5+ | hours a month | |
|  | 1 | 2 | 3 | 4 | 5+ | hours a month | |
|  | 1 | 2 | 3 | 4 | 5+ | hours a month | |

| **SECTION 3: Background** |
| --- |

| ***Current address or cross street:*** |  |
| --- | --- |

| ***Age*** |  | 18-24 |  | 25-34 |  | 35-44 |  | 45-54 |  | 55-64 |  | 65-74 |  | 75+ |
| --- | --- | --- | --- | --- | --- | --- | --- | --- | --- | --- | --- | --- | --- | --- |

| ***Household***  ***Income*** |  | Less than $40,000 |  | $60,001 --- $80,000 |  | $100,001 --- $120,000 |
| --- | --- | --- | --- | --- | --- | --- |
|  | $40,001 --- $60,000 |  | $80,001 --- $100,000 |  | Over $120,001 |

| ***Marital Status*** |  | Single, never married |  | Widowed |  | Separated |
| --- | --- | --- | --- | --- | --- | --- |
|  | Married or domestic partnership |  | Divorced |  |  |

| ***Education*** |  | Some high school |  | Associate’s degree |
| --- | --- | --- | --- | --- |
|  | High school diploma |  | Bachelor's degree |
|  | Some college, no degree |  | Master's degree / Professional degree / Doctoral degree |

| ***Race*** |  | White |  | Asian | |
| --- | --- | --- | --- | --- | --- |
|  | Black or African American |  | Native Hawaiian or Pacific Islander | |
|  | American Indian or Alaska Native |  | Other: |  |

| ***Ethnicity*** |  | Spanish, Hispanic, or Latino |  | None of These |
| --- | --- | --- | --- | --- |

| ***Gender*** |  | Man |  | Woman |  | Other Self Assigned Gender: |  |
| --- | --- | --- | --- | --- | --- | --- | --- |

| ***Employment Status*** |  | Employed full-time (40 or more hours per week) |  | Student |
| --- | --- | --- | --- | --- |
|  | Employed part-time (up to 39 hours per week) |  | Retired / not looking for work |
|  | Unemployed and currently looking for work |  | Homemaker |
|  | Furloughed |  | Unable to work |

| **If unemployed or furloughed, was that a result of COVID19?** |  |  |  |
| --- | --- | --- | --- |
| Yes | No | Does Not Apply |

| **Do you own or rent your home?** |  |  |
| --- | --- | --- |
| Own | Rent |

| **"I have lived in my current home for …"**  *Please write your response in the boxes to the right.* |  | year(s) |  | month(s) |
| --- | --- | --- | --- | --- |

| **"I have lived in my current community for …"**  *Please write your response in the boxes to the right.* |  | year(s) |  | month(s) |
| --- | --- | --- | --- | --- |

| **How many neighbors do you know by name on your block?** |  |  |  |  |
| --- | --- | --- | --- | --- |
| 0-2 | 3-5 | 6-8 | 9+ |

| **Please respond to the following based on how much you agree or disagree with the statement:** | | | | | |
| --- | --- | --- | --- | --- | --- |
|  | Strongly agree | Somewhat agree | Neither agree nor disagree | Somewhat disagree | Strongly disagree |
| “In general, I think that I can obtain outcomes that are important to me.” |  |  |  |  |  |
| “Even when things are tough, I can perform quite well.” |  |  |  |  |  |

| **Generally speaking, do you consider yourself as a Republican, Democrat, Independent, or other?** | | | | | | |
| --- | --- | --- | --- | --- | --- | --- |
| Strong Republican | Moderate Republican | Independent | Moderate Democrat | Strong Democrat | Other party | Don't know |
|  |  |  |  |  |  |  |

# Interview Questions

**1. BACKGROUND**

*I’m going to ask you some questions about how you’ve accessed information during the COVID-19 outbreak, what your greatest challenges have been, the role of community in your experience, and the changes you’ve made in your daily life.*

1. Before we jump, could you share with me how the COVID-19 outbreak has impacted your life?

**2. INFORMATION ACCESS**

*Now we’re going to talk about accessing information during the COVID-19 outbreak.*

1. **Could you tell me a little more about the information you relied on to get through the coronavirus outbreak?**
   1. *Listen for unlisted sources and probe those.*
   2. *Listen for news aggregators and probe on those. Follow up question:*
      1. Were there any news sources for your aggregator that you considered trusted sources of information?
   3. *Listen for Facebook/Twitter news feed.*
      1. Facebook: Can you recall who posted the information you relied on?
         1. Was it a friend, family member, or someone you know well?
         2. Was it a post from a Page you follow?
         3. Was it a PSA?
         4. Was it an advertisement?
   4. You indicated that [x,y,z] were your primary information sources, as well, in your survey response. Could you tell me a little more about why you relied on these sources for information?
2. How did you access [x,y,z] sources of information?
3. What did you learn from sources [x,y,z], respectively, to confront the challenges of COVID-19?
4. How do you think the pandemic has changed your trust in information?

**3: COVID-19 CHANGES IN YOUR DAY-TO-DAY**

1. Could you tell me more about the changes have you made in your life to confront the challenges of the coronavirus outbreak?
2. What has been the greatest challenge in implementing [said changes]?
3. What change do you consider most important to protect you and/or your family from COVID-19?
4. What do you consider to be the second most important change you’ve made to protect you and/or your family from COVID-19?
5. Were there any changes you wanted to make, but couldn’t? Would you mind sharing the reason why these changes were impossible to implement?

**4. COMMUNITY**

*Now I’m going to ask you some questions about you and your community during the COVID-19 outbreak.*

1. What role did the community play in the past couple of months?
2. Did you rely on any ***close family or friends***? Could you share how you relied on close family or friends?
3. Did you offer support to ***close family or friends***? Could you share how you offered support to close family or friends?
4. Did you rely on any ***organizations/groups***? Would you mind sharing which organization(s)? [Probe: neighborhood, religious, community, PTA, book club]
5. Could you share how [said organization] helped you get through the outbreak? [Probe: did you rely on someone you already knew in the group/organization or on the staff or leadership]
6. Did you offer support to any ***organizations*** to help others get through the outbreak? Would you mind sharing which organization, and how you offered support?

**5. DEALING WITH COVID-19 Challenges**

*Now I will be asking questions about the challenges you’ve faced in the times of the*

*pandemic and how you’ve overcome them. We’ve talked a lot about many of the challenges you’ve faced in the past few months. I want you to take a step back and think about the GREATEST challenge you’ve encountered.*

1. What has been the greatest challenge you’ve confronted during the outbreak?
2. How did you address this/these challenge(s)?
3. Who did you reach out to for help to address these challenges?
4. Can you please share a story about the help you received?
5. How has the government helped or hindered you to address these challenges?

**6: WRAP UP**

*Thank you so much for your time and responses. We are at the end of our interview.*

1. Do you have any questions for me or anything you would like to talk about that I have not asked about?
2. Would you be interested in participating in a focus group?
